# 1 Transcriptome- and proteome-wide Mendelian randomization to 2 prioritize therapeutic targets for coronary heart disease

3  
4 Liam Gaziano PhD<sup>#1,2</sup>, Elias Allara MD, PhD<sup>#2,3,4</sup>, Claudia Giambartolomei PhD<sup>5,6</sup>, David  
5 Stacey PhD<sup>7,8</sup>, Jing Hua Zhao PhD<sup>2,3</sup>, Hesam Dashti PhD<sup>9,10</sup>, Tao Jiang MSc<sup>2,11</sup>, Scott C. Ritchie  
6 PhD<sup>2,3,12,13,14,15,16</sup>, Brian R Ferolito MS<sup>9</sup>, Danielle Rasooly PhD<sup>9,17</sup>, Gina M. Peloso  
7 PhD<sup>9,18</sup>, Emanuele Di Angelantonio MD, PhD, FMedSci<sup>2,3,4,5,12,13</sup>, Eleanor Wheeler PhD<sup>19</sup>, Maik  
8 Pietzner PhD<sup>19,20,21</sup>, Themistocles L Assimes MD, PhD<sup>22,23</sup>, Peter WF Wilson MD<sup>24,25</sup>, Kelly  
9 Cho PhD, MPH<sup>26,27,28</sup>, Krishna G Aragam MD, MS<sup>29,30</sup>, Stephen Burgess PhD<sup>2,31</sup>, John Danesh  
10 FMedSci<sup>2,3,4,12,13,32</sup>, Claudia Langenberg MD, PhD<sup>19,20,21</sup>, Juan Pablo Casas MD, PhD<sup>33</sup>, J  
11 Michael Gaziano MD, MPH<sup>26,27,28</sup>, Alexandre C Pereira MD, PhD<sup>†9,27,28,34</sup>, Adam S Butterworth  
12 PhD<sup>†2,3,4,12,13</sup>

13  
14 #Contributed equally. †Contributed equally.

15  
16 <sup>1</sup>Massachusetts Veterans Epidemiology Research and Information Center (MAVERIC), Veterans  
17 Affairs Healthcare System, Boston, MA, USA

18 <sup>2</sup>British Heart Foundation Cardiovascular Epidemiology Unit, Department of Public Health and  
19 Primary Care, University of Cambridge, Cambridge, UK

20 <sup>3</sup>Victor Phillip Dahdaleh Heart and Lung Research Institute, University of Cambridge,  
21 Cambridge, UK

22 <sup>4</sup>NIHR Blood and Transplant Research Unit in Donor Health and Behaviour, Department of  
23 Public Health and Primary Care, University of Cambridge, Cambridge, UK

24 <sup>5</sup>Health Data Science Centre, Human Technopole, Milan, Italy

25 <sup>6</sup>Million Veteran Program (MVP) Consultant, Veterans Affairs Healthcare System, Boston, MA,  
26 USA

27 <sup>7</sup>Australian Centre for Precision Health, Unit of Clinical and Health Sciences, University of  
28 South Australia, Adelaide, South Australia, Australia

29 <sup>8</sup>South Australian Health and Medical Research Institute, Adelaide, South Australia, Australia

30 <sup>9</sup>Million Veteran Program (MVP) Coordinating Center, Veterans Affairs Healthcare System,  
31 Boston, MA, USA

32 <sup>10</sup>Broad Institute of MIT and Harvard, Cambridge, MA, USA

33 <sup>11</sup>Victor Philip Dahdaleh Heart and Lung Research Institute, University of Cambridge,  
34 Cambridge, UK

35 <sup>12</sup>British Heart Foundation Centre of Research Excellence, University of Cambridge, Cambridge,  
36 UK

37 <sup>13</sup>Health Data Research UK Cambridge, University of Cambridge, Cambridge, UK

38 <sup>14</sup>Health Data Research UK Cambridge, Wellcome Genome Campus, Hinxton, UK

39 <sup>15</sup>Cambridge Baker Systems Genomics Initiative, Department of Public Health and Primary  
40 Care, University of Cambridge, Cambridge, UK

41 <sup>16</sup>Cambridge Baker Systems Genomics Initiative, Baker Heart & Diabetes Institute, Melbourne,  
42 Victoria, Australia

43 <sup>17</sup>Division of Aging, Brigham and Women's Hospital, Harvard Medical School, Boston, MA,  
44 USA

45 <sup>18</sup>Department of Biostatistics, Boston University School of Public Health, Boston, MA, USA

46 <sup>19</sup>MRC Epidemiology Unit, University of Cambridge, Cambridge, UK

47 <sup>20</sup>Precision Healthcare University Research Institute, Queen Mary University of London,  
48 London, UK  
49 <sup>21</sup>Computational Medicine, Berlin Institute of Health at Charité - Universitätsmedizin Berlin,  
50 Berlin, Germany  
51 <sup>22</sup>VA Palo Alto Health Care System, Palo Alto, CA, USA  
52 <sup>23</sup>Department of Medicine, Stanford University School of Medicine, Stanford, CA, USA  
53 <sup>24</sup>Emory University School of Medicine (Cardiology), Emory University, Atlanta, GA, USA  
54 <sup>25</sup>Internal Medicine, VA Atlanta Healthcare System, Decatur, GA, USA  
55 <sup>26</sup>Million Veteran Program (MVP) Coordinating Center, VA Boston Healthcare System, Boston,  
56 MA, USA  
57 <sup>27</sup>Division of Aging, Brigham and Women's Hospital, Harvard Medical School, Boston, MA,  
58 USA  
59 <sup>28</sup>Department of Medicine, Brigham and Women's Hospital, Harvard Medical School, Boston,  
60 MA, USA  
61 <sup>29</sup>Cardiology Division, Massachusetts General Hospital, Boston, MA, USA  
62 <sup>30</sup>Cardiovascular Disease Initiative, Broad Institute of MIT and Harvard, Cambridge, MA, USA  
63 <sup>31</sup>MRC Biostatistics Unit, University of Cambridge, Cambridge, UK  
64 <sup>32</sup>Human Genetics, Wellcome Sanger Institute, Hinxton, UK  
65 <sup>33</sup>Biomarker Development/Translational Medicine, Novartis Institutes for BioMedical Research,  
66 Cambridge, MA, USA  
67 <sup>34</sup>Laboratory of Genetics and Molecular Cardiology, Heart Institute, University of Sao Paulo,  
68 Sao Paulo, Brazil

69  
70 Corresponding author: Professor Adam Butterworth  
71 Department of Public Health and Primary Care  
72 University of Cambridge  
73 Victor Phillip Dahdaleh Heart & Lung Research Institute,  
74 Papworth Road, Cambridge, CB2 0BB  
75 Tel. 0044 1223 748673  
76 E-mail: [asb38@medschl.cam.ac.uk](mailto:asb38@medschl.cam.ac.uk)  
77  
78  
79

80 Manuscript word count: 3703  
81  
82  
83

84

## 85 **Abstract**

86 Despite widespread use of drugs targeting traditional cardiovascular risk factors such as lipids and  
87 blood pressure, a high burden of coronary heart disease (CHD) remains, hence novel therapeutics  
88 are needed for people who harbor residual risk. Using transcriptomic and proteomic data to  
89 instrument 15,527 genes or proteins, we conducted systematic *cis*-Mendelian randomization (MR)  
90 and conditional colocalization analyses with a genetic meta-analysis involving nearly 300,000  
91 CHD cases. We identified 567 targets with putative causal relevance to CHD, of which 69 were  
92 not identified in previous genetic discovery or MR studies and were the sole causal signal in that  
93 genomic region. To aid translation of our findings, we annotated results with up-to-date  
94 information on drugs acting on these targets. Our results revealed opportunities for drug  
95 repurposing and development prioritization. For example, we provide evidence that cilostazol, a  
96 drug that targets *PDE3A* and is currently used for claudication, could be repurposed for prevention  
97 of CHD.

98

99

## 100 **Introduction**

101  
102 There is a need to develop novel therapeutics to prevent CHD, which remains a leading cause of  
103 death in adults across the globe<sup>1</sup>. Although several safe and effective drugs exist for primary  
104 prevention of CHD, many adults experience residual hypertension or dyslipidemia following  
105 standard therapies<sup>2,3</sup>, suggesting a need to identify new approaches to target these traditional  
106 cardiovascular risk factors. Furthermore, an increasing proportion of myocardial infarctions occur  
107 in patients without traditional cardiovascular risk factors<sup>4</sup>, highlighting the need to identify and  
108 modulate novel pathways implicated in coronary atherosclerosis and thrombosis.

109  
110 Around 50% of drug development failures occur due to lack of efficacy<sup>5</sup>, suggesting that the  
111 chosen target is not causally related to the outcome. Mendelian randomization (MR)<sup>6</sup> analyses  
112 exploit the random allocation of genetic alleles through the population and avoid the pitfalls of  
113 relying on pre-clinical models that may not translate to human biology. Indeed, drugs that target  
114 proteins with supportive evidence from human genetic studies have a higher chance of gaining  
115 regulatory approval<sup>7</sup>.

116  
117 Recently, large-scale proteomic profiling has led to the creation of extensive catalogs of genetic  
118 variants that influence circulating protein levels<sup>8-11</sup>. Similarly, the GTEx consortium<sup>12</sup> has  
119 measured transcriptome-wide RNA levels in nearly 50 tissues to identify associated genetic  
120 variants. In combination, these resources can provide tissue-specific instruments to evaluate the  
121 causal relevance of the human proteome and transcriptome on CHD. To achieve this goal, we  
122 leverage transcriptomic and proteomic summary statistics to perform Mendelian randomization  
123 and colocalization analyses between more than 15,000 genes or proteins and the risk of CHD,

124 utilizing a *de novo* genome-wide association study (GWAS) meta-analysis involving nearly  
125 300,000 cases from the Million Veteran Program<sup>13</sup>, CARDIoGRAMplusC4D<sup>14</sup> and FinnGen<sup>15</sup>.  
126

## 127 **Results**

128 We took a similar approach as our previous transcriptomic and proteomic MR analyses<sup>16</sup>, with  
129 the overall study design for the current analysis shown in **Figure 1**. To minimize the potential for  
130 horizontal pleiotropy (i.e. the CHD-associated variants acting through a different gene/protein to  
131 the one being instrumented), we used locally-acting (*cis*), conditionally-independent, protein  
132 quantitative trait loci (*cis*-pQTLs) to instrument levels of 1,497 plasma proteins assayed using the  
133 SomaScan V4 platform in the Fenland study<sup>17</sup> (**Supplementary Table 1**). We also selected  
134 conditionally-independent, *cis* gene expression QTLs (*cis*-eQTLs) from Version 8 of the  
135 Genotype-Tissue Expression (GTEx) resource<sup>12</sup> as instruments for 15,412 protein-coding genes  
136 (**Supplementary Table 2**). With these instruments, we performed MR using a GWAS meta-  
137 analysis of CHD that we conducted using results from European ancestry participants of the  
138 Million Veteran Program (MVP)<sup>18</sup>, the latest CARDIoGRAMplusC4D Consortium GWAS<sup>14</sup>, and  
139 the FinnGen biobank<sup>15</sup> involving 296,537 CHD cases among 1,593,766 participants  
140 (**Supplementary Table 3**). 15,527 genes or proteins had at least one instrumental variant in at  
141 least one tissue, hence we set a Bonferroni-adjusted significance threshold at  $P=3.22\times 10^{-6}$   
142 (0.05/15,527). A full list of MR results can be found in **Supplementary Table 4**. To reduce the  
143 possibility that MR associations arise due to confounding by linkage disequilibrium (LD), we  
144 additionally performed a pairwise conditional colocalization<sup>19</sup> analysis between pQTL or eQTL  
145 summary statistics and CHD summary statistics for all significant MR results. We annotated  
146 results (those that passed both Bonferroni-adjusted P-value for MR and colocalization  
147 [PPH4>0.80] thresholds) with information about drugs that act on these targets using the  
148 OpenTargets<sup>20</sup> and DrugBank<sup>21</sup> resources (**Supplementary Table 5-7**), and assessed novelty and  
149 potential for horizontal pleiotropy (**Supplementary Table 8**). For specific targets of interest, we

150 performed phenome-wide association scans of instrumental variants and colocalization to identify  
151 putative mechanisms, safety signals and alternative indications (**Supplementary Table 9**). Lastly,  
152 we conducted enrichment analyses to assess whether the potential causal genes for CHD occur  
153 more frequently in certain biological pathways (**Supplementary Table 10**).

154

155 Overall, we found 567 unique genes/proteins colocalizing with CHD. Using eQTL instruments,  
156 736 genes passed the MR significance threshold ( $P < 3.22 \times 10^{-6}$ ) with 551 (74.9%) colocalizing  
157 (PPH4 > 0.8). Using pQTL instruments, 39 proteins passed MR significance with 24 colocalizing.  
158 Twenty of these were also tested using eQTL instruments, of which nine (*ABO*, *GSTT2B*, *IL6R*,  
159 *MST1*, *MXRA7*, *PCSK9*, *PDE5A*, *TMEM106A*, *TMEM106B*) also passed the colocalization  
160 threshold, and seven (*ABO*, *GSTT2B*, *MST1*, *MXRA7*, *PCSK9*, *PDE5A*, *TMEM106A*) had an eQTL  
161 signal in at least one tissue in the same direction as the plasma pQTL.

162

### 163 **Replication of past Mendelian randomization studies**

164 We assessed whether we could replicate results from two transcriptome-/proteome-wide MR  
165 studies that have included CHD as an outcome, both of which used outcome summary statistics  
166 from the 2015 CARDIoGRAMplusC4D GWAS that included 60,801 CHD cases<sup>22</sup>. First, Zheng  
167 et al.<sup>19</sup> used five<sup>9,23-26</sup> publicly available pQTL resources to select instrumental variants,  
168 identifying *LPA* and *IL6R* with MR  $P < 3.22 \times 10^{-6}$  when restricting to results that used *cis*-  
169 instruments and colocalized. Here, we also identified *IL6R* ( $P = 2.5 \times 10^{-22}$ , highest PPH4 in any  
170 tissue is 1.00) but could not assess *LPA*, as it is not measured on the SomaScan V4 panel. Second,  
171 Richardson et al.<sup>27</sup> used *cis*-eQTL variants from GTEx Version 7 and eQTLGen<sup>28</sup> as instruments  
172 and found 21 protein-coding genes with MR  $P < 3.22 \times 10^{-6}$  and  $P_{\text{HEIDI}}$  (a test for confounding by

173 LD) >0.05, of which 20 were replicated here (*ABO*, *AIDA*, *ATP2B1*, *CARF*, *CELSR2*, *FAM117B*,  
174 *FES*, *GGCX*, *GUCY1A1*, *ICAIL*, *JCAD*, *LIPA*, *MIA3*, *MORF4L1*, *MRAS*, *NBEAL1*, *PHACTR1*,  
175 *PSRC1*, *SORT1*, *SWAP70*), suggesting that our framework identifies robust results. Only *VAMP8*  
176 from Richardson *et al.* did not colocalize in our analysis (highest PPH4 in any tissue was 0.33). In  
177 the *VAMP8* region, we instead identified *GGCX* ( $P=1.7 \times 10^{-52}$ , PPH4=1.00 in aortic artery tissue),  
178 which is targeted by the Anisindione, an anticoagulant occasionally used in those who cannot  
179 tolerate warfarin<sup>29</sup>. It is reassuring that our approach identified *GGXC* over *VAMP8* in that region,  
180 considering the biological role of *GGCX* in coagulation by activating vitamin K-dependent  
181 proteins and the relevance of coagulation to CHD.

182

### 183 **Assessment of horizontal pleiotropy**

184 We considered an instrumental variant that influences expression of multiple genes / proteins as  
185 having the potential to introduce a form of horizontal pleiotropy that arises from shared regulation  
186 of nearby genes. Therefore, we grouped results with instrumental variants that are in close  
187 proximity (250kb) or are correlated ( $r^2 > 0.2$  in 1000 Genomes EUR). The 567 genes/proteins,  
188 hereafter referred to as “targets”, that passed MR and colocalization thresholds lie within 283  
189 genomic regions. We allocated results into tiers based on the number of targets within a genomic  
190 region: Tier 1 includes 165 targets that are the sole result within a region to pass MR and  
191 colocalization thresholds, while the remaining 404 results (located within 116 regions) were  
192 annotated as Tier 2 (**Supplementary Table 8**). Tier 1 genes included several well-known to relate  
193 to CHD risk, such as *APOB*, *IL6R*, *IL1RN*, *LIPA*, and others previously identified by GWAS as  
194 the most likely causal gene in the region, such as *ITGA1*, *MYO9B*, and *SERPINA1*<sup>14</sup>. Because we  
195 tested all protein-coding genes in GTEx, Tier 1 results that are the only significant signal in the



196 region are less likely to exhibit this form of horizontal pleiotropy. Conversely, since Tier 2 results  
197 contain multiple targets, it can be difficult to disentangle the gene responsible for driving the  
198 signal(s) in each region using MR and colocalization alone. For example, in one region on  
199 chromosome 1 (region #13 in **Supplementary Table 8**), there are four targets (*SARSI*, *CELSR2*,  
200 *PSRC1* and *SORT1*) that pass MR and colocalization thresholds. However, previous functional  
201 work has shown that *SORT1* is likely driving the signal in the 1p13.3 locus<sup>30</sup>, meaning results for  
202 *SARSI*, *CELSR2*, and *PSRC1* likely arose due to horizontal pleiotropy (**Supplementary Figure**  
203 **1**).

204

### 205 **Novel putative therapeutic targets**

206 We classified results as novel if they (1) were based on instrumental variants that were not  
207 correlated ( $r^2 < 0.2$  in 1000 Genomes EUR) or in close proximity ( $\pm 250\text{kb}$ ) with genome-wide  
208 significant ( $P < 5 \times 10^{-8}$ ) variants for CHD reported in Tcheandjieu *et al.*<sup>18</sup>, Aragam *et al.*<sup>14</sup>, or  
209 Supplementary Table 2 of Aragam *et al.*<sup>14</sup> which includes 216 CHD-associated variants previously  
210 reported in the literature and (2) were not reported in Zheng *et al.*<sup>19</sup> or Richardson *et al.*<sup>27</sup>. We  
211 classified 184 targets as novel, 69 of which were classified also as Tier 1 (**Figure 2**,  
212 **Supplementary Table 8**).

213

### 214 **Targets with existing drugs**

215 Of the 567 targets that passed MR and colocalization thresholds, 30 had drugs developed that act  
216 on these targets according to DrugBank<sup>21</sup> (**Supplementary Table 5**) and 32 according to  
217 OpenTargets<sup>20</sup> (**Supplementary Table 6**), of which 19 from both. Forty-three targets had an  
218 existing drug according to either DrugBank or OpenTargets and the remaining 524 targets were

219 classified as not currently having a drug (**Supplementary Table 7**). Of the 43 targets with existing  
220 drugs, several are involved in well-known vascular pathways such as lipid metabolism (e.g.,  
221 *PCSK9*, *LPL*, *APOC3*, *NPC1L1*, *CETP*, *ABCA1*), hemostasis (e.g., *F11*, *FN1*, *PDE3A*, *PIK3CB*,  
222 *TFPI*, *KLKB1*, *PDE8A*, *GGCX*) and inflammation (e.g. *IL6R*, *IL23A*, *MIF*). Some of these - such  
223 as *PCSK9*<sup>31</sup>, *NPICLI*<sup>32</sup>, and *CETP*<sup>33</sup> - have already been shown to be effective therapeutic targets  
224 for CHD in clinical trials, while others like *IL6R* are currently being tested<sup>34</sup>.

225

### 226 *Repurposing*

227 Our results also reveal notable repurposing opportunities. An example is the novel, Tier 1 result  
228 for *PDE3A*, which is targeted by several inhibitory drugs for a wide range of indications, including  
229 thrombotic events and respiratory diseases (**Supplementary Table 5 and 6**). Higher genetically-  
230 predicted expression of *PDE3A* was positively associated with CHD ( $P=2.25\times 10^{-7}$ ) using a  
231 colocalizing (PPH4=0.99) eQTL instrumental variant (rs7488772) in subcutaneous adipose tissue,  
232 suggesting that therapeutic inhibition might be beneficial. A phenome-wide association scan with  
233 colocalization (PheWAS-coloc) for rs7488772 showed that higher genetically-predicted  
234 expression of *PDE3A* was associated with higher levels of several cardiometabolic risk factors,  
235 including systolic blood pressure, triglycerides, and glycated hemoglobin (**Figure 3** and  
236 **Supplementary Table 9**).

237

### 238 *Identifying safety concerns for non-cardiovascular drugs*

239 We also found an inverse association between higher genetically-predicted expression of *CXCR4*  
240 (instrumented by rs10171574) and risk of CHD ( $P=9.52\times 10^{-7}$ ) (**Supplementary Table 5**).  
241 PheWAS-coloc showed associations of the CHD-increasing (and *CXCR4*-decreasing) allele with

242 higher neutrophil percentage of white blood cells and lower lymphocyte percentage of white blood  
243 cells (**Supplementary Figure 2** and **Supplementary Table 9**). These associations are consistent  
244 with the role of *CXCR4* inhibitors such as plerixafor, which is commonly used in stem cell  
245 transplantation to mobilize granulocytes and their precursors into the blood stream<sup>35</sup>. Our findings  
246 suggest that *CXCR4* inhibitors (e.g. plerixafor and uloplucumab) may increase risk of CHD in an  
247 on-target fashion, raising potential safety concerns for long-term use.

248

#### 249 *Disentangling effects for drugs with multiple targets*

250 One therapeutic target, *PLA2G5*, which encodes secretory phospholipase A2 group V (sPLA2-V),  
251 is inhibited by Varespladib methyl. We found that higher genetically-predicted *PLA2G5*  
252 expression, a Tier 1 result, was associated with higher risk of CHD ( $P=3.18\times 10^{-6}$ ) (**Figure 4**) using  
253 an instrumental variant (rs12408798) in aortic artery tissue (PPH4=0.99). However, Varespladib  
254 methyl did not reduce coronary events in ~5000 patients with acute coronary syndrome in the  
255 VISTA-16 trial<sup>36</sup>, and even showed an increased risk of myocardial infarction. Varespladib methyl  
256 also targets isoenzymes sPLA2-IIA (encoded by *PLA2G2A*) and sPLA2-X (encoded by  
257 *PLA2G10*)<sup>37</sup>. Here, eQTL instruments for *PLA2G2A* expression appeared in multiple tissues, none  
258 of which were associated with CHD ( $P>0.52$ ), while there was no eQTL instrument for *PLA2G10*  
259 in any tissue nor a pQTL instrument.

260

#### 261 **Targets currently without a drug**

262 The 524 targets for which drugs do not currently exist can help prioritize drug development  
263 programs. For example, we found positive associations for genetically-predicted *ABCA8*  
264 expression with risk of CHD ( $P=6.50\times 10^{-7}$ ), suggesting ATP binding cassette subfamily A

265 member 8 as a potential therapeutic target. PheWAS-coloc for *ABCA8* (instrumented by  
266 rs34931250 in several tissues) showed positive associations with LDL-cholesterol concentration  
267 and Apolipoprotein B, and inverse associations with HDL-cholesterol and Apolipoprotein-A1  
268 (**Figure 5** and **Supplementary Table 9**), suggesting pro-atherogenic lipids and poor cholesterol  
269 efflux as the potential mediators.

270

### 271 **Pathway and gene ontology term enrichment analysis**

272 To determine whether our set of 567 putative causal genes for CAD was over-represented in  
273 specific biological mechanisms or pathways, we performed enrichment analyses using Enrichr<sup>38-</sup>  
274 <sup>40</sup>. Overall, we found significant ( $P_{adj}<0.05$ ) evidence of enrichment for 25 Kyoto Encyclopedia  
275 of Genes and Genomes (KEGG) pathways or gene ontology (GO) terms, with the highest  
276 significance observed for lipid-related categories (**Supplementary Table 10**). This included the  
277 KEGG pathways “cholesterol metabolism” ( $P=8.85\times 10^{-10}$ , odds ratio [OR]=12.32) and “fat  
278 digestion and absorption” ( $P=2.37\times 10^{-5}$ , OR=7.95), as well as the GO terms “lipoprotein particle  
279 remodeling” ( $P=3.35\times 10^{-5}$ , OR=12.24) and “sterol transfer activity” ( $P=1.49\times 10^{-4}$ , OR=12.36).  
280 Furthermore, Enrichr also highlighted ( $P_{adj}<0.05$ ) GO terms relating to endothelial cell migration  
281 ( $P=2.71\times 10^{-5}$ , OR=5.19), focal adhesion ( $P=3.00\times 10^{-4}$ , OR=2.33), and cell-substrate junctions  
282 ( $P=4.03\times 10^{-4}$ , OR=2.28). Thus, these analyses revealed a highly significant enrichment of genes  
283 involved in CAD-related biological pathways and mechanisms.

284

285 We then performed a separate enrichment analysis focusing specifically on our set of 165 Tier 1  
286 putative causal genes. These analyses highlighted 51 significant ( $P_{adj}<0.05$ ) KEGG pathways or  
287 GO terms (**Supplementary Table 11**), double the number observed in the previous enrichment

288 analysis of all 567 candidates and which again included the KEGG pathways “cholesterol  
289 metabolism” ( $P=3.39\times 10^{-6}$ , OR=16.97) and “fat digestion and absorption” ( $P=4.29\times 10^{-4}$ ,  
290 OR=12.61). The Tier 1 analysis also highlighted a major theme related to cell migration, motility,  
291 and chemotaxis, while reiterating an enrichment of gene products localized to focal adhesions  
292 ( $P=4.18\times 10^{-6}$ , OR=4.84) and cell-substrate junctions ( $P=5.29\times 10^{-6}$ , OR=4.73). Together, this  
293 analysis, confined to the 165 Tier 1 genes, highlights pathways that influence CAD risk by  
294 regulating spatial arrangements and interactions between cells at the arterial wall, which is  
295 consistent with current models of atherosclerosis<sup>41</sup>.

296

## 297 **Discussion**

298  
299 Using instruments derived from gene expression in multiple tissues and plasma protein levels, we  
300 identified 567 targets within 283 genomic regions with a putative causal relevance to CHD. We  
301 annotated the findings with information on existence of current targeting drugs to aid translation  
302 of our findings into actionable interventions and followed-up specific results with phenome-wide  
303 scans and colocalization to identify possible mechanisms or on-target safety concerns. While  
304 previous studies have used transcriptomic and proteomic genetic instruments on CHD<sup>19,27</sup>, none  
305 have been applied to a GWAS of this size. As a result, this analysis increased the number of  
306 genes/proteins with putative causal relevance to the development of CHD, with 69 novel, Tier 1,  
307 eQTL-CHD or pQTL-CHD pairs.

308  
309 These results can help establish novel therapeutics for prevention of CHD in several ways. First,  
310 we identified possible opportunities for drugs currently on the market, that might be repurposed.  
311 PDE3A is targeted by multiple small molecules, two of which (milrinone and amrinone) were  
312 tested in overt heart failure but displayed null or harmful effects<sup>42-44</sup>, and one, cilostazol, which is  
313 currently used for intermittent claudication. Cilostazol has antiplatelet and vasodilatory effects<sup>45</sup>  
314 by inhibiting PDE3A's catalysis of inactive adenosine monophosphate (AMP) from cyclic  
315 (cAMP). We found higher genetically-predicted *PDE3A* expression to be positively associated  
316 with CHD and a number of cardiovascular risk factors. Some of the PheWAS-coloc results for the  
317 *PDE3A* instrumental variant have been additionally corroborated by human trials of cilostazol. For  
318 example, trials have found that cilostazol reduces triglycerides and increases HDL-cholesterol<sup>46,47</sup>.  
319 Cilostazol, in addition to its antiplatelet effects, also acts as a vasodilator, so the PheWAS-coloc  
320 result for systolic blood pressure is perhaps not surprising, especially considering cilostazol has

321 been shown in trials to reduce ankle brachial index<sup>48</sup>. The congruence between existing trial data  
322 and the PheWAS-coloc analysis provides evidence that the instrumental variant for *PDE3A*  
323 expression is accurately mimicking the on-target effects of cilostazol. Our findings additionally  
324 corroborate previous findings for PDE3B (a protein with similar function as PDE3A and is also  
325 targeted by Cilostazol<sup>49</sup>), which found loss of function mutations in *PDE3B* are associated with  
326 reductions in CHD, decreased triglycerides, and increased HDL-C<sup>50</sup>.

327  
328 Cilostazol has also been shown to reduce secondary ischemic stroke by 32% in a meta-analysis of  
329 trials<sup>51</sup>. It is often tested against antiplatelet drugs, like aspirin, clopidogrel, or a combination of  
330 the two, and has shown superiority in preventing bleeding events as well, including a 57%  
331 reduction in hemorrhagic stroke<sup>51</sup>. While aspirin and clopidogrel reduce CHD in primary  
332 prevention, there is debate about whether the increased bleeding risk outweighs the benefits<sup>52</sup>.  
333 Therefore, large trials of cilostazol for primary prevention of CHD may be warranted to determine  
334 if it provides a safer and more effective antiplatelet strategy than aspirin or clopidogrel.

335  
336 Second, our findings can help clear up questions surrounding drugs that target multiple proteins.  
337 Varespladib inhibits isoenzymes sPLA2-V (encoded by *PLA2G5*), sPLA2-IIA (encoded by  
338 *PLA2G2A*) and sPLA2-X (encoded by *PLA2G10*). All three of these genes have been assessed  
339 previously in MR studies for CHD and all have been null<sup>53-55</sup>. The previous study instrumented  
340 gene expression of *PLA2G5* with rs525380 in aorta adventitia tissue from 133 participants of the  
341 Advanced Study of Aortic Pathology (ASAP). ASAP participants were genotyped using the  
342 Illumina Human 610 W-Quad Bead array without imputation. The variant from Holmes *et al.*,  
343 rs525380, is in weak LD ( $r^2=0.28$  in 1000 Genomes European ancestry) with the one used here for

344 *PLA2G5*, and this may explain the different results (**Figure 4**). We replicated a separate study that  
345 found no association between genetically-predicted *PLA2G2A* and CHD<sup>54</sup> that used an identical  
346 instrumental variant as the present analysis (rs11573156). A previous MR analysis on sPLA2-X  
347 suffered from weak instruments for *PLA2G10* expression<sup>55</sup> (similarly, there were no significant  
348 eQTLs for *PLA2G10* in GTEx), and without strong genetic instruments it is difficult to understand  
349 its causal relevance to CHD through MR.

350

351 The phase 3 VISTA-16 trial found that Varespladib had no effect on a composite outcome of  
352 cardiovascular mortality, nonfatal MI, nonfatal stroke, or unstable angina in those with acute  
353 coronary syndrome<sup>36</sup> but did find an increase in myocardial infarction. This may be explained by  
354 Varespladib's inhibition of sPLA2-X, which showed antiatherogenic effects in mouse models<sup>56</sup>.  
355 Indeed, Varespladib is five times more active for sPLA2-X than sPLA2-V, with half maximal  
356 inhibitory concentrations of 15 nM for sPLA2-X versus 77 nM for sPLA2-V<sup>57</sup>. In aggregate, these  
357 results suggest that specific inhibition of sPLA2-V without inhibition of sPLA2-IIA or sPLA2-X  
358 could be an effective intervention for CHD prevention.

359

360 Third, MR results for non-druggable targets can help to indicate which targets should be carried  
361 forward for development. We found that higher levels of *ABCA8* gene expression decrease HDL-  
362 cholesterol levels and increase LDL-cholesterol levels and risk of CHD, suggesting that  
363 modulating *ABCA8* could prevent CHD, potentially through either reductions in Apo-B-  
364 containing lipoproteins or improved cholesterol efflux. Our findings for HDL-cholesterol are  
365 discordant with studies of deleterious *ABCA8* mutations and *ABCA8* knock-out mice, which have  
366 shown *decreased* HDL-cholesterol levels<sup>58-60</sup>. Combined with the biological role of *ABCA8* and



367 other ATP binding cassette proteins<sup>58</sup>, and the congruence between the effect of the instrumental  
368 variant on ApoB-containing lipoproteins and CHD, these findings suggest that it is actually  
369 reduced ABCA8 protein levels that increase ApoB-containing lipoproteins and risk of CHD. This  
370 highlights one of the challenges of transcriptomic-derived instruments, in that there are several  
371 reasons why expression of a gene may be elevated. For example, gene expression may be  
372 upregulated as a compensatory mechanism for a variant that causes decreased function of a protein  
373 through changes in key amino acids, splicing, or other mechanisms. It is possible such a  
374 phenomenon is occurring for *ABCA8*, particularly because the instrumental variant lies within a  
375 splice region<sup>61</sup>. More in-depth evaluation of *ABCA8* and the many other potentially causal targets  
376 instrumented by gene expression are warranted to determine the desired direction of therapeutic  
377 modulation.

378

379 Lastly, our findings can help identify on-target effects of drugs that may increase the risk of CHD,  
380 suggesting potential safety concerns We found an association between greater expression of  
381 *CXCR4* and lower risk of CHD, which is consistent with a previous study in hyperlipidemic mice<sup>62</sup>.  
382 Additionally, *CXCL12*, the natural ligand for *CXCR4*, shows a positive, Tier 1, association for  
383 CHD in our analysis. *CXCR4*, which encodes C-X-C chemokine receptor type 4, is the target of  
384 multiple marketed medications, including Plerixafor and Ulocuplumab, and our findings suggest  
385 that these drugs could increase the risk of CHD in an on-target fashion. *CXCR4* inhibitors are  
386 currently used in stem cell transplant donors to elicit more stem cells into the peripheral blood and  
387 this transient use is unlikely to have a lasting harmful impact on CHD risk. However, they have  
388 been considered for more long-term use for other conditions<sup>63-65</sup>, and our findings recommend  
389 evaluation of cardiovascular safety in such settings. Other drug development programs can

390 similarly use our findings to better predict whether a drug for any disease could have a harmful  
391 on-target effect on CHD.

392

393 The major limitation of our analytical approach is that within 116 loci there were multiple targets  
394 that passed MR and colocalization thresholds. Tier 2 results that lie within the same genomic  
395 region, like the *SORT1*, *CELSR2* and *PSRC1* locus, provide evidence that even *cis*-instruments  
396 may exhibit horizontal pleiotropy, perhaps through shared regulation of multiple local genes or  
397 linkage disequilibrium, making it difficult to determine the true causal target(s) in a region.  
398 Although the approach taken here equally prioritizes these genes, functional work has suggested  
399 that *SORT1* is likely driving the signal in the 1p13.3 locus<sup>30</sup>. Conversely, though, due to our  
400 comprehensive testing of all protein-coding genes in GTEx, Tier 1 results that are the only result  
401 in the region are more likely to be the causal gene driving the association.

402

403 There are other limitations as well. This study was undertaken in almost exclusively European  
404 ancestry, so other studies in diverse ancestries are warranted. The pQTL MR only covers a small  
405 proportion of the human proteome and instrumenting plasma protein levels may not always  
406 provide the most relevant tissue in the context of CHD. The eQTL MR analysis used instruments  
407 for gene expression which may not translate to effects on protein levels in a relevant cell type.  
408 Lastly it can be difficult through MR, especially with gene expression data, to determine how much  
409 inhibition or activation of a certain protein is required for a meaningful reduction in CHD.

410

411 Our study has several strengths. We conducted a *de novo* GWAS meta-analysis involving nearly  
412 300,000 CHD cases, providing a well-powered outcome dataset. We performed conditional

413 colocalization analysis to robustly test for pleiotropy, avoiding the one-signal-per-locus limitation  
414 of the traditional colocalization approaches. Annotations of results with up-to-date information on  
415 the druggable genome help facilitate translation into actionable interventions. Further  
416 investigations with phenome-wide scans with colocalization on instrumental variants can identify  
417 possible on-target safety concerns as well as elucidate potential mechanisms for CHD  
418 pathogenesis.

419  
420 In summary, our transcriptomics and proteomics analysis identified 69 novel, Tier 1 targets with  
421 putative causal relevance for CHD. We show opportunities for drug repurposing and development  
422 prioritization. Additionally, our results can be used for understanding CHD safety of current and  
423 future drugs indicated for non-cardiovascular diseases.

424

425

## 426 **References**

- 427 1. Global burden of 369 diseases and injuries in 204 countries and territories, 1990-2019: a  
428 systematic analysis for the Global Burden of Disease Study 2019. *Lancet* **396**, 1204-1222  
429 (2020).
- 430 2. Reith, C. & Armitage, J. Management of residual risk after statin therapy. *Atherosclerosis*  
431 **245**, 161-70 (2016).
- 432 3. Noubiap, J.J. *et al.* Global prevalence of resistant hypertension: a meta-analysis of data  
433 from 3.2 million patients. *Heart* **105**, 98-105 (2019).
- 434 4. Vernon, S.T. *et al.* Increasing proportion of ST elevation myocardial infarction patients  
435 with coronary atherosclerosis poorly explained by standard modifiable risk factors. *Eur J*  
436 *Prev Cardiol* **24**, 1824-1830 (2017).
- 437 5. Harrison, R.K. Phase II and phase III failures: 2013-2015. *Nat Rev Drug Discov* **15**, 817-  
438 818 (2016).
- 439 6. Burgess, S., Butterworth, A. & Thompson, S.G. Mendelian randomization analysis with  
440 multiple genetic variants using summarized data. *Genet Epidemiol* **37**, 658-65 (2013).
- 441 7. Minikel, E.V., Painter, J.L., Dong, C.C. & Nelson, M.R. Refining the impact of genetic  
442 evidence on clinical success. *Nature* (2024).
- 443 8. Pietzner, M. *et al.* Mapping the proteo-genomic convergence of human diseases. *Science*  
444 **374**, eabj1541 (2021).
- 445 9. Sun, B.B. *et al.* Genomic atlas of the human plasma proteome. *Nature* **558**, 73-79 (2018).
- 446 10. Ferkingstad, E. *et al.* Large-scale integration of the plasma proteome with genetics and  
447 disease. *Nat Genet* **53**, 1712-1721 (2021).
- 448 11. Folkersen, L. *et al.* Genomic and drug target evaluation of 90 cardiovascular proteins in  
449 30,931 individuals. *Nat Metab* **2**, 1135-1148 (2020).
- 450 12. The Genotype-Tissue Expression (GTEx) project. *Nat Genet* **45**, 580-5 (2013).
- 451 13. Gaziano, J.M. *et al.* Million Veteran Program: A mega-biobank to study genetic influences  
452 on health and disease. *J Clin Epidemiol* **70**, 214-23 (2016).
- 453 14. Aragam, K.G. *et al.* Discovery and systematic characterization of risk variants and genes  
454 for coronary artery disease in over a million participants. *Nat Genet* **54**, 1803-1815 (2022).
- 455 15. Mars, N. *et al.* Polygenic and clinical risk scores and their impact on age at onset and  
456 prediction of cardiometabolic diseases and common cancers. *Nat Med* **26**, 549-557 (2020).
- 457 16. Gaziano, L. *et al.* Actionable druggable genome-wide Mendelian randomization identifies  
458 repurposing opportunities for COVID-19. *Nature Medicine* (2021).
- 459 17. Pietzner, M. *et al.* Synergistic insights into human health from aptamer- and antibody-  
460 based proteomic profiling. *Nat Commun* **12**, 6822 (2021).
- 461 18. Tcheandjieu, C. *et al.* Large-scale genome-wide association study of coronary artery  
462 disease in genetically diverse populations. *Nat Med* **28**, 1679-1692 (2022).
- 463 19. Zheng, J. *et al.* Phenome-wide Mendelian randomization mapping the influence of the  
464 plasma proteome on complex diseases. *Nat Genet* **52**, 1122-1131 (2020).
- 465 20. Ochoa, D. *et al.* Open Targets Platform: supporting systematic drug-target identification  
466 and prioritisation. *Nucleic Acids Research* **49**, D1302-D1310 (2020).
- 467 21. Wishart, D.S. *et al.* DrugBank 5.0: a major update to the DrugBank database for 2018.  
468 *Nucleic Acids Res* **46**, D1074-d1082 (2018).
- 469 22. Nikpay, M. *et al.* A comprehensive 1,000 Genomes-based genome-wide association meta-  
470 analysis of coronary artery disease. *Nat Genet* **47**, 1121-1130 (2015).

- 471 23. Suhre, K. *et al.* Connecting genetic risk to disease end points through the human blood  
472 plasma proteome. *Nat Commun* **8**, 14357 (2017).
- 473 24. Folkersen, L. *et al.* Mapping of 79 loci for 83 plasma protein biomarkers in cardiovascular  
474 disease. *PLoS Genet* **13**, e1006706 (2017).
- 475 25. Yao, C. *et al.* Genome-wide mapping of plasma protein QTLs identifies putatively causal  
476 genes and pathways for cardiovascular disease. *Nat Commun* **9**, 3268 (2018).
- 477 26. Emilsson, V. *et al.* Co-regulatory networks of human serum proteins link genetics to  
478 disease. *Science* **361**, 769-773 (2018).
- 479 27. Richardson, T.G., Hemani, G., Gaunt, T.R., Relton, C.L. & Davey Smith, G. A  
480 transcriptome-wide Mendelian randomization study to uncover tissue-dependent  
481 regulatory mechanisms across the human phenome. *Nat Commun* **11**, 185 (2020).
- 482 28. van der Wijst, M. *et al.* The single-cell eQTLGen consortium. *Elife* **9**(2020).
- 483 29. Spyropoulos, A.C., Hayth, K.A. & Jenkins, P. Anticoagulation with anisindione in a patient  
484 with a warfarin-induced skin eruption. *Pharmacotherapy* **23**, 533-6 (2003).
- 485 30. Musunuru, K. *et al.* From noncoding variant to phenotype via SORT1 at the 1p13  
486 cholesterol locus. *Nature* **466**, 714-9 (2010).
- 487 31. Sabatine, M.S. *et al.* Evolocumab and Clinical Outcomes in Patients with Cardiovascular  
488 Disease. *N Engl J Med* **376**, 1713-1722 (2017).
- 489 32. Cannon, C.P. *et al.* Ezetimibe Added to Statin Therapy after Acute Coronary Syndromes.  
490 *N Engl J Med* **372**, 2387-97 (2015).
- 491 33. Bowman, L. *et al.* Effects of Anacetrapib in Patients with Atherosclerotic Vascular  
492 Disease. *N Engl J Med* **377**, 1217-1227 (2017).
- 493 34. Ridker, P.M. From RESCUE to ZEUS: will interleukin-6 inhibition with ziltivekimab  
494 prove effective for cardiovascular event reduction? *Cardiovasc Res* **117**, e138-e140 (2021).
- 495 35. De Clercq, E. Mozobil®(Plerixafor, AMD3100), 10 years after its approval by the US Food  
496 and Drug Administration. *Antiviral Chemistry and Chemotherapy* **27**, 2040206619829382  
497 (2019).
- 498 36. Nicholls, S.J. *et al.* Varespladib and cardiovascular events in patients with an acute  
499 coronary syndrome: the VISTA-16 randomized clinical trial. *Jama* **311**, 252-62 (2014).
- 500 37. Carvalho-Silva, D. *et al.* Open Targets Platform: new developments and updates two years  
501 on. *Nucleic Acids Res* **47**, D1056-d1065 (2019).
- 502 38. Chen, E.Y. *et al.* Enrichr: interactive and collaborative HTML5 gene list enrichment  
503 analysis tool. *BMC Bioinformatics* **14**, 128 (2013).
- 504 39. Kuleshov, M.V. *et al.* Enrichr: a comprehensive gene set enrichment analysis web server  
505 2016 update. *Nucleic Acids Res* **44**, W90-7 (2016).
- 506 40. Xie, Z. *et al.* Gene Set Knowledge Discovery with Enrichr. *Curr Protoc* **1**, e90 (2021).
- 507 41. Engelen, S.E., Robinson, A.J.B., Zurke, Y.X. & Monaco, C. Therapeutic strategies  
508 targeting inflammation and immunity in atherosclerosis: how to proceed? *Nat Rev Cardiol*  
509 **19**, 522-542 (2022).
- 510 42. Cuffe, M.S. *et al.* Short-term intravenous milrinone for acute exacerbation of chronic heart  
511 failure: a randomized controlled trial. *Jama* **287**, 1541-7 (2002).
- 512 43. Packer, M. *et al.* Effect of oral milrinone on mortality in severe chronic heart failure. The  
513 PROMISE Study Research Group. *N Engl J Med* **325**, 1468-75 (1991).
- 514 44. Massie, B. *et al.* Long-term oral administration of amrinone for congestive heart failure:  
515 lack of efficacy in a multicenter controlled trial. *Circulation* **71**, 963-71 (1985).

- 516 45. Zhang, W. & Colman, R.W. Thrombin regulates intracellular cyclic AMP concentration in  
517 human platelets through phosphorylation/activation of phosphodiesterase 3A. *Blood* **110**,  
518 1475-82 (2007).
- 519 46. Thompson, P.D., Zimet, R., Forbes, W.P. & Zhang, P. Meta-analysis of results from eight  
520 randomized, placebo-controlled trials on the effect of cilostazol on patients with  
521 intermittent claudication. *Am J Cardiol* **90**, 1314-9 (2002).
- 522 47. Rizzo, M., Corrado, E., Patti, A.M., Rini, G.B. & Mikhailidis, D.P. Cilostazol and  
523 atherogenic dyslipidemia: a clinically relevant effect? *Expert Opin Pharmacother* **12**, 647-  
524 55 (2011).
- 525 48. Bedenis, R. *et al.* Cilostazol for intermittent claudication. *Cochrane Database Syst Rev*  
526 **2014**, Cd003748 (2014).
- 527 49. Sudo, T. *et al.* Potent effects of novel anti-platelet aggregatory cilostamide analogues on  
528 recombinant cyclic nucleotide phosphodiesterase isozyme activity. *Biochem Pharmacol*  
529 **59**, 347-56 (2000).
- 530 50. Klarin, D. *et al.* Genetics of blood lipids among ~300,000 multi-ethnic participants of the  
531 Million Veteran Program. *Nat Genet* **50**, 1514-1523 (2018).
- 532 51. McHutchison, C. *et al.* Cilostazol for Secondary Prevention of Stroke and Cognitive  
533 Decline: Systematic Review and Meta-Analysis. *Stroke* **51**, 2374-2385 (2020).
- 534 52. Patrono, C. & Baigent, C. Role of aspirin in primary prevention of cardiovascular disease.  
535 *Nat Rev Cardiol* **16**, 675-686 (2019).
- 536 53. Holmes, M.V. *et al.* Novel genetic approach to investigate the role of plasma secretory  
537 phospholipase A2 (sPLA2)-V isoenzyme in coronary heart disease: modified Mendelian  
538 randomization analysis using PLA2G5 expression levels. *Circ Cardiovasc Genet* **7**, 144-  
539 50 (2014).
- 540 54. Holmes, M.V. *et al.* Secretory phospholipase A(2)-IIA and cardiovascular disease: a  
541 mendelian randomization study. *J Am Coll Cardiol* **62**, 1966-1976 (2013).
- 542 55. Guardiola, M. *et al.* PLA2G10 Gene Variants, sPLA2 Activity, and Coronary Heart  
543 Disease Risk. *Circ Cardiovasc Genet* **8**, 356-62 (2015).
- 544 56. Ait-Oufella, H. *et al.* Group X secreted phospholipase A2 limits the development of  
545 atherosclerosis in LDL receptor-null mice. *Arterioscler Thromb Vasc Biol* **33**, 466-73  
546 (2013).
- 547 57. Rosenson, R.S. *et al.* Effects of 1-H-indole-3-glyoxamide (A-002) on concentration of  
548 secretory phospholipase A2 (PLASMA study): a phase II double-blind, randomised,  
549 placebo-controlled trial. *Lancet* **373**, 649-58 (2009).
- 550 58. Trigueros-Motos, L. *et al.* ABCA8 Regulates Cholesterol Efflux and High-Density  
551 Lipoprotein Cholesterol Levels. *Arterioscler Thromb Vasc Biol* **37**, 2147-2155 (2017).
- 552 59. Wang, C.Y. *et al.* A Novel Nonsense Mutation of ABCA8 in a Han-Chinese Family With  
553 ASCVD Leads to the Reduction of HDL-c Levels. *Front Genet* **11**, 755 (2020).
- 554 60. Motazacker, M.M. *et al.* Evidence of a polygenic origin of extreme high-density  
555 lipoprotein cholesterol levels. *Arterioscler Thromb Vasc Biol* **33**, 1521-8 (2013).
- 556 61. Zeng, T. & Li, Y.I. Predicting RNA splicing from DNA sequence using Pangolin. *Genome*  
557 *Biol* **23**, 103 (2022).
- 558 62. Döring, Y. *et al.* Vascular CXCR4 Limits Atherosclerosis by Maintaining Arterial  
559 Integrity. *Circulation* **136**, 388-403 (2017).

- 560 63. Ghobrial, I.M. *et al.* A Phase Ib/II Trial of the First-in-Class Anti-CXCR4 Antibody  
561 Ulocuplumab in Combination with Lenalidomide or Bortezomib Plus Dexamethasone in  
562 Relapsed Multiple Myeloma. *Clin Cancer Res* **26**, 344-353 (2020).
- 563 64. McDermott, D.H. *et al.* Plerixafor for the Treatment of WHIM Syndrome. *N Engl J Med*  
564 **380**, 163-170 (2019).
- 565 65. McDermott, D.H. *et al.* A phase III randomized crossover trial of plerixafor versus G-CSF  
566 for treatment of WHIM syndrome. *J Clin Invest* **133**(2023).
- 567 66. Hemani, G. *et al.* The MR-Base platform supports systematic causal inference across the  
568 human phenome. *Elife* **7**(2018).
- 569 67. Pruim, R.J. *et al.* LocusZoom: regional visualization of genome-wide association scan  
570 results. *Bioinformatics* **26**, 2336-7 (2010).
- 571 68. O'Connor, L., Brage, S., Griffin, S.J., Wareham, N.J. & Forouhi, N.G. The cross-sectional  
572 association between snacking behaviour and measures of adiposity: the Fenland Study,  
573 UK. *British journal of nutrition* **114**, 1286-1293 (2015).
- 574 69. Willer, C.J., Li, Y. & Abecasis, G.R. METAL: fast and efficient meta-analysis of  
575 genomewide association scans. *Bioinformatics* **26**, 2190-1 (2010).
- 576 70. Yang, J. *et al.* Conditional and joint multiple-SNP analysis of GWAS summary statistics  
577 identifies additional variants influencing complex traits. *Nat Genet* **44**, 369-75, s1-3 (2012).
- 578 71. Auton, A. *et al.* A global reference for human genetic variation. *Nature* **526**, 68-74 (2015).
- 579 72. Giambartolomei, C. *et al.* Bayesian test for colocalisation between pairs of genetic  
580 association studies using summary statistics. *PLoS Genet* **10**, e1004383 (2014).
- 581 73. Robinson, J.W. *et al.* An efficient and robust tool for colocalisation: Pair-wise Conditional  
582 and Colocalisation (PWCoco). *bioRxiv*, 2022.08.08.503158 (2022).
- 583  
584  
585

586 **Author contribution**

587 L.G., J.P.C., A.C.P., and A.S.B. conceptualized the study. E.W. M.P. and C.L. generated pQTL  
588 information. S.C.R., T.J., K.A., T.J.A., P.W.F.W., K.C. assisted in preparation of CHD summary  
589 statistics. L.G. performed the Mendelian randomization analysis. C.G. performed conditional  
590 colocalization analysis on CHD. E.A. performed phenome-wide scans of instrumental variants  
591 with conditional colocalization. D.S. performed pathway enrichment analysis. L.G., J.H.Z., and  
592 E.A. generated figures. L.G., E.A., A.C.P., and A.S.B. wrote the manuscript. A.S.B. oversaw all  
593 analyses. All authors contributed to study design and provided editorial comments.

594

595 **Competing interests**

596 J.P.C. moved to work with Novartis Institute for Biomedical Research during the completion of  
597 this project. E.W. is now an employee of AstraZeneca. A.S.B. reports institutional grants from  
598 AstraZeneca, Bayer, Biogen, BioMarin, Biooverativ, Novartis, Regeneron and Sanofi. J. Danesh  
599 serves on scientific advisory boards for AstraZeneca, Novartis and the UK Biobank and has  
600 received multiple grants from academic, charitable and industry sources outside of the submitted  
601 work.



## 602 Figure Legends

603

604 **Figure 1. Overall study summary.** We used *cis*-pQTLs to instrument 1,497 plasma proteins and  
605 *cis*-eQTLs to instrument 15,412 protein-coding genes to perform MR on a GWAS meta-analysis  
606 of CHD totaling 296,537 cases. For significant ( $P < 3.22 \times 10^{-6}$ ) MR results, we additionally  
607 performed colocalization using a pairwise conditional and colocalization (PWCoCo)<sup>19</sup> approach  
608 between pQTL or eQTL summary statistics and CHD. Lastly, we annotated results (those that  
609 passed both Bonferroni-adjusted P-value for MR and colocalization [PP.H4 > 0.80] thresholds)  
610 according to whether an existing drug according status using the OpenTargets<sup>37</sup> or DrugBank<sup>21</sup>.

611

612 **Figure 2. Circos plot from Mendelian randomization and colocalization analysis.** Targets  
613 that are labeled are Tier 1 and novel results that passed MR ( $P < 3.22 \times 10^{-6}$ ) and colocalization  
614 thresholds (PPH4 > 0.8). Tier 1 results are defined as those that are not in close proximity  
615 (+250kb) or correlated ( $r^2 > 0.2$  in 1000 Genomes EUR) with any other result that passed MR and  
616 colocalization thresholds. Results were defined as novel if they (1) were based on instrumental  
617 variants that were not correlated ( $r^2 < 0.2$  in 1000 Genomes EUR) or in close proximity ( $\pm 250$ kb)  
618 with genome-wide significant ( $P < 5 \times 10^{-8}$ ) variants for CHD reported in Aragam *et al.*<sup>14</sup> or  
619 Tcheandjieu *et al.*<sup>18</sup> or Supplementary Table 2 of Aragam *et al.*<sup>14</sup> which includes CHD-  
620 associated variants previously reported in the literature and (2) were not previously reported in  
621 Zheng *et al.*<sup>19</sup> or Richardson *et al.*<sup>27</sup> Targets with existing drug according to either OpenTargets<sup>37</sup>  
622 or DrugBank<sup>21</sup> are labeled in red, targets without a current drug are labeled in black.

623

624 **Figure 3. Phenome-wide scan and colocalization results for *PDE3A*.** Results are shown for  
625 scans in MR Base<sup>66</sup> of rs7488772, the instrumental variant for *PDE3A* in adipose subcutaneous  
626 tissue. (a) results for all genetic associations with  $P < 1 \times 10^{-5}$  (aligned by CHD-increasing allele;  
627 positive betas are shown in blue and negative betas in red; if the same trait is estimated in more  
628 than one dataset, this plot shows the one with the smallest p-value) and conditional  
629 colocalization PPH4  $\geq 0.8$  (if a trait colocalizes with more than one variant after conditional  
630 analysis, this plot shows the highest PPH4), and (b) LocusZoom<sup>67</sup> plots for selected  
631 cardiometabolic traits. Results from colocalization analyses using marginal summary statistics  
632 are labeled as ‘unconditioned’. Results from conditional colocalization show the conditioning  
633 variant in the plot title.

634

635 **Figure 4. Results for *PLA2G5* and *PLA2G2A*.** (a) Mendelian randomization results for  
636 *PLA2G5* and *PLA2G2A* in all tissues where an instrument exists. Only results for *PLA2G5*  
637 in aortic artery tissue (highlighted in blue) passed the P-value significance threshold and  
638 was tested for colocalization. All results are from eQTL except for *PLA2F2A* / blood  
639 plasma which are derived from pQTL. Regional association statistics for (b) gene  
640 expression of *PLA2G5* in aortic artery tissue from GTEx and (c) coronary heart disease.  
641 (a) and (b) show the pairwise correlation (1000G European ancestry) for each variant with  
642 rs12408798, the instrumental variant used in the present study. (a) and (b) colocalize at  
643 PPH4 = 0.98. (d) Local association plot of the *PLA2G5* region for coronary heart disease,  
644 showing the correlation for rs525380, the instrumental variant for *PLA2G5* expression used  
645 in the previous study Holmes *et al.*<sup>53</sup> The association for rs525380 and CHD was  $P = 0.20$   
646 in Holmes *et al.*<sup>53</sup> and  $P = 0.009$  in the present study.

647

648 **Figure 5. Phenome-wide scan and colocalization results for *ABCA8*.** Results are shown for  
649 scans in MR Base<sup>66</sup> of rs34931250, the instrumental variant for *ABCA8*. **(a)** results for all genetic  
650 associations with  $P < 1 \times 10^{-5}$  (aligned by CHD-increasing allele; positive betas are shown in blue  
651 and negative betas in red; if the same trait is estimated in more than one datasets, this plot shows  
652 the one with the smallest p-value) and conditional colocalization  $PPH4 \geq 0.8$  (if a trait colocalizes  
653 with more than one variant after conditional analysis, this plot shows the highest PPH4), and **(b)**  
654 LocusZoom plots for selected cardiovascular traits. Results from colocalization analyses using  
655 marginal summary statistics are labeled as ‘unconditioned’.  
656  
657

## 658 **Methods**

### 659 **Selecting genetic instruments**

660 First, we selected conditionally-independent *cis*-pQTLs for plasma proteins reported in Pietzner *et*  
661 *al.* ([www.omicscience.org](http://www.omicscience.org))<sup>8</sup> Briefly, protein levels were measured by SomaLogic Inc (Boulder,  
662 Colorado, US) with the SomaScan® V4 platform in 10,708 European-ancestry individuals from  
663 the Fenland cohort<sup>17,68</sup>. This technique uses DNA-aptamers called SOMAmers, oligonucleotide  
664 strands that fold and bind to proteins with high specificity, and association analyses were  
665 performed for 5,210 SOMAmers. We removed pQTLs with minor allele frequency (MAF)<0.01,  
666 *trans*-pQTLs and SOMAmers that measured more than one protein.

667  
668 For eQTL instruments, we downloaded a file provided by the Genotype-Tissue Expression (GTEx)  
669 Consortium version 8<sup>12</sup>  
670 ([https://storage.googleapis.com/gtex\\_analysis\\_v8/single\\_tissue\\_qtl\\_data/GTEx\\_Analysis\\_v8\\_eQ](https://storage.googleapis.com/gtex_analysis_v8/single_tissue_qtl_data/GTEx_Analysis_v8_eQTL_independent.tar)  
671 [TL\\_independent.tar](https://storage.googleapis.com/gtex_analysis_v8/single_tissue_qtl_data/GTEx_Analysis_v8_eQTL_independent.tar)) that included all conditionally independent *cis*-eQTLs for expression of all  
672 genes in 49 tissues. We excluded eQTLs for non-protein-coding genes (i.e. those that do not have  
673 a UniProt ID),  $P > 5 \times 10^{-8}$  and MAF<0.01. We also removed eQTLs, pQTLs or genes that lie  
674 within the human leukocyte antigen (HLA) region (chr6:29691116-33054976), due to the  
675 complicated LD structure in that region.

676

### 677 **Generation of outcome summary statistics**

678 To generate outcome summary statistics for CHD, we meta-analyzed results from three non-  
679 overlapping sources: The Million Veteran Program (MVP)<sup>18</sup>, CARDIoGRAMplusC4D  
680 Consortium<sup>14</sup>, and the FinnGen biobank<sup>15</sup>. MVP is an ongoing biobank recruiting from 63

681 Veterans Affairs (VA) facilities across the United States<sup>13</sup>. In MVP, we utilized a GWAS that  
682 consisted of European ancestry individuals. The CARDIoGRAMplusC4D Consortium is a GWAS  
683 meta-analysis on CHD from many contributing studies, primarily of European ancestry<sup>14</sup>. FinnGen  
684 is a consortium of biobanks within Finland that includes participants linked to electronic health  
685 data. For FinnGen, we downloaded summary statistics for the I9\_ISCHHEART outcome  
686 ([gs://finngen-public-data-r3/summary\\_stats/finngen\\_r3\\_I9\\_ISCHHEART.gz](gs://finngen-public-data-r3/summary_stats/finngen_r3_I9_ISCHHEART.gz)) from release 3,  
687 which defined CHD as ICD-10 I20-I25. We meta-analyzed summary statistics from the three data  
688 sources using METAL software<sup>69</sup> with fixed-effects and inverse-variance weighting.

689

### 690 **Mendelian Randomization**

691 We used the TwoSampleMR R package (<https://github.com/MRCIEU/TwoSampleMR>) to  
692 estimate MR effects between instruments and CHD. Inverse variance-weighted MR with fixed-  
693 effects was used for instruments with more than one variant, and the Wald ratio method for  
694 instruments with one variant. For instruments with more than one variant, we additionally assessed  
695 heterogeneity across the variant-level MR estimates and reported the Cochran Q *P* value.

696

### 697 **Conditional Colocalization**

698 Significant MR associations can arise from a strong association between an instrumental variant  
699 and an outcome that is not causal, but in LD with a peak variant (i.e. an MR estimate can be due  
700 to confounding by LD and not due to a shared causal variant). To address this, we performed  
701 colocalization between the pQTL or eQTL summary statistics and CHD for all results that passed  
702 the MR *P*-value threshold. Additionally, when performing colocalization, false negatives can arise  
703 from interference of a strong independent signal, because conventional colocalization methods

704 traditionally assume one causal variant within the tested region. To address this, we performed  
705 pairwise conditional colocalization<sup>19</sup>, which requires conditional summary statistics for each  
706 region. Conditional analyses for pQTL data from Pietzner *et al.*<sup>8</sup> were conducted using GCTA-  
707 COJO<sup>70</sup> and a reference panel of genotypes from the Fenland cohort. GCTA-COJO is a stepwise  
708 model selection procedure to select independently associated SNPs using the LD structure to  
709 account for the correlation between SNPs. For eQTLs, we generated summary statistics using raw  
710 genotype data from European ancestry participants following the procedure outlined by the GTEx  
711 Consortium. Briefly, after filtering the genotypes (MAF<0.01, HWE<0.000001, and no ambiguous  
712 SNPs), GWAS between variants and gene expression was performed adjusting for the top 5  
713 principal components, PEER factors, sequencing platform and sex. Conditional analysis for gene  
714 expression were performed with raw genotype data by iteratively adjusting for the most strongly  
715 associated variant in a region. Conditional analysis for CHD summary statistics were performed  
716 using GCTA-COJO with a 1000G<sup>71</sup> European ancestry reference panel.

717  
718 Pairwise colocalization was performed using the COLOC R package<sup>72</sup> on regions  $\pm 200$ kb around  
719 the instrumental variant with at least 50 SNPs matching across the two datasets. The prior  
720 probability of each SNP that is causal to only one of the traits (PPH3) was set to  $1 \times 10^{-5}$  and  
721 causal to both traits (PPH4) was set to  $1 \times 10^{-6}$ . A posterior probability of a shared causal variant  
722 (PPH4) of  $\geq 80\%$  for any of the conditional iterations was considered strong evidence of  
723 colocalization.

724

725 **Drugs against identified targets**

726 Targets that passed MR and colocalization thresholds were annotated with information on drugs  
727 against targets from by OpenTargets<sup>20</sup> and DrugBank<sup>21</sup>. We used DrugBank release 5.1.10,  
728 (<https://go.drugbank.com/releases>) and restricted to known pharmacologically active drug-target  
729 pairs.

730

### 731 **Assessment of horizontal pleiotropy**

732 Valid instrumental variants for MR must meet the exclusion restriction requirement, which  
733 assumes that the variant only affects the outcome through the instrumented exposure. A variant is  
734 an invalid instrument if it alters expression of other genes or proteins that affect the outcome  
735 through distinct biological/causal pathways (horizontal pleiotropy). In the case that results for  
736 multiple genes/proteins in a region colocalize with the same CHD signal, it can be difficult to  
737 disentangle which is truly influencing CHD risk. Therefore, we considered a variant that influences  
738 expression of nearby genes through shared regulation as possibly introducing horizontal pleiotropy  
739 and grouped results into regions based on instrumental variants that are in close proximity  
740 (+250kb) or correlated ( $r^2 > 0.2$  in 1000 Genomes EUR). Because we tested all protein-coding genes  
741 in GTEx, results that are the only significant signal in a region are less likely to exhibit horizontal  
742 pleiotropy. Therefore, we allocated results into tiers based on the number of results within a  
743 genomic region, where Tier 1 results are the sole result within a region to pass MR and  
744 colocalization thresholds, and Tier 2 results contain multiple signals within a region.

745

### 746 **Phenome-wide scans of instrumental variants**

747 For some results that passed both MR and colocalization thresholds, we performed Phenome-wide  
748 association scan with colocalization (PheWAS) of instrumental variants. Associations between

749 instrumental variants with disease and traits can mimic on-target effects of therapeutic targeting  
750 observed in trials. This can provide confidence that instrumental variants are correctly mimicking  
751 on-target effects of a drug. Additionally, a PheWAS analysis can identify possible harmful effects  
752 of protein modulation or provide mechanistic insights. Therefore, we queried instrumental variants  
753 for associations with diseases and traits in the MRbase PheWAS platform<sup>66</sup>, a database that allows  
754 for PheWAS across a wide range of publicly available datasets. For PheWAS associations with  $P$   
755  $<1 \times 10^{-5}$  we also performed pairwise conditional colocalization between eQTL and traits regional  
756 summary stats, to help ensure those associations are not due to confounding by LD. For this, we  
757 utilized the PwCoCo v. 1.0 (<https://github.com/jwr-git/pwcoco/tree/pwcoco-v1.0>) tool<sup>73</sup>, using LD  
758 information from the UK Biobank after restricting the analysis sample to 367,641 unrelated  
759 European-ancestry participants. We set the prior probabilities that each SNP was causal to either  
760 of the traits (PPH3) and causal to both traits (PPH4) to  $1 \times 10^{-5}$  and  $1 \times 10^{-6}$ , respectively. We  
761 considered a posterior probability of a shared causal variant (PPH4) of  $\geq 80\%$  as strong evidence  
762 of colocalization. For inspection with LocusZoom<sup>67</sup>  
763 ([http://genome.sph.umich.edu/wiki/LocusZoom\\_Standalone](http://genome.sph.umich.edu/wiki/LocusZoom_Standalone)), we also exported conditioned  
764 genetic associations using the "--out-cond" option in PwCoCo.

765

## 766 **Pathway and gene ontology term enrichment analysis**

767 Pathway and functional term enrichment analyses were performed with Enrichr  
768 (<https://maayanlab.cloud/Enrichr/>)<sup>38-40</sup> by inputting the HGNC symbols for all putative causal  
769 targets as a single gene set. Briefly, Enrichr uses the Fisher's exact test to assess whether the  
770 putative causal gene set was enriched with genes assigned to a given GO term or KEGG pathway  
771 relative to a permuted background gene set. An odds ratio significantly greater than one is

772 indicative of an enriched term or pathway. Correction for multiple testing ( $P_{adj}$ ) was conducted  
773 using the Benjamini-Hochberg procedure.

774

775

776



777 **Acknowledgements**

778 Scott C. Ritchie was funded by a British Heart Foundation (BHF) Programme Grant  
779 (RG/18/13/33946) and by the National Institute for Health and Care Research (NIHR) Cambridge  
780 BRC (BRC-1215-20014; NIHR203312) [\*] \* The views expressed are those of the authors and  
781 not necessarily those of the NIHR or the Department of Health and Social Care. Emanuele Di  
782 Angelantonio holds an NIHR Senior Investigator Award. Stephen Burgess is supported by the  
783 Wellcome Trust (225790/Z/22/Z) and the United Kingdom Research and Innovation Medical  
784 Research Council (MC\_UU\_00002/7). John Danesh holds a British Heart Foundation  
785 Professorship and an NIHR Senior Investigator Award. Adam Butterworth and Claudia  
786 Langenberg were supported by BHF-DZHK grant funding “Prot4CVD: Translational proteomics  
787 for cardiovascular diseases: from population prediction to clinical and therapeutic applications”  
788 (FKZ 81X2100281). The BHF Cardiovascular Epidemiology Unit was supported by core funding  
789 from the NIHR Blood and Transplant Research Unit in Donor Health and Genomics (NIHR  
790 BTRU-2014-10024), the NIHR BTRU in Donor Health and Behaviour (NIHR203337), the UK  
791 Medical Research Council (MR/L003120/1), the British Heart Foundation (SP/09/002;  
792 RG/13/13/30194; RG/18/13/33946) and NIHR Cambridge BRC (BRC-1215-20014). This work  
793 was also supported by Health Data Research UK, which is funded by the UK Medical Research  
794 Council, the Engineering and Physical Sciences Research Council, the Economic and Social  
795 Research Council, the Department of Health and Social Care (England), the Chief Scientist Office  
796 of the Scottish Government Health and Social Care Directorates, the Health and Social Care  
797 Research and Development Division (Welsh Government), the Public Health Agency (Northern  
798 Ireland), the British Heart Foundation and Wellcome. Some analyses were performed using  
799 resources provided by the Cambridge Service for Data Driven Discovery (CSD3) operated by the

800 University of Cambridge Research Computing Service (<https://www.csd3.cam.ac.uk>), provided  
801 by Dell EMC and Intel using tier 2 funding from the Engineering and Physical Sciences Research  
802 Council (capital grant EP/P020259/1), and DiRAC funding from the Science and Technology  
803 Facilities Council (<https://www.dirac.ac.uk>).

804

805

806

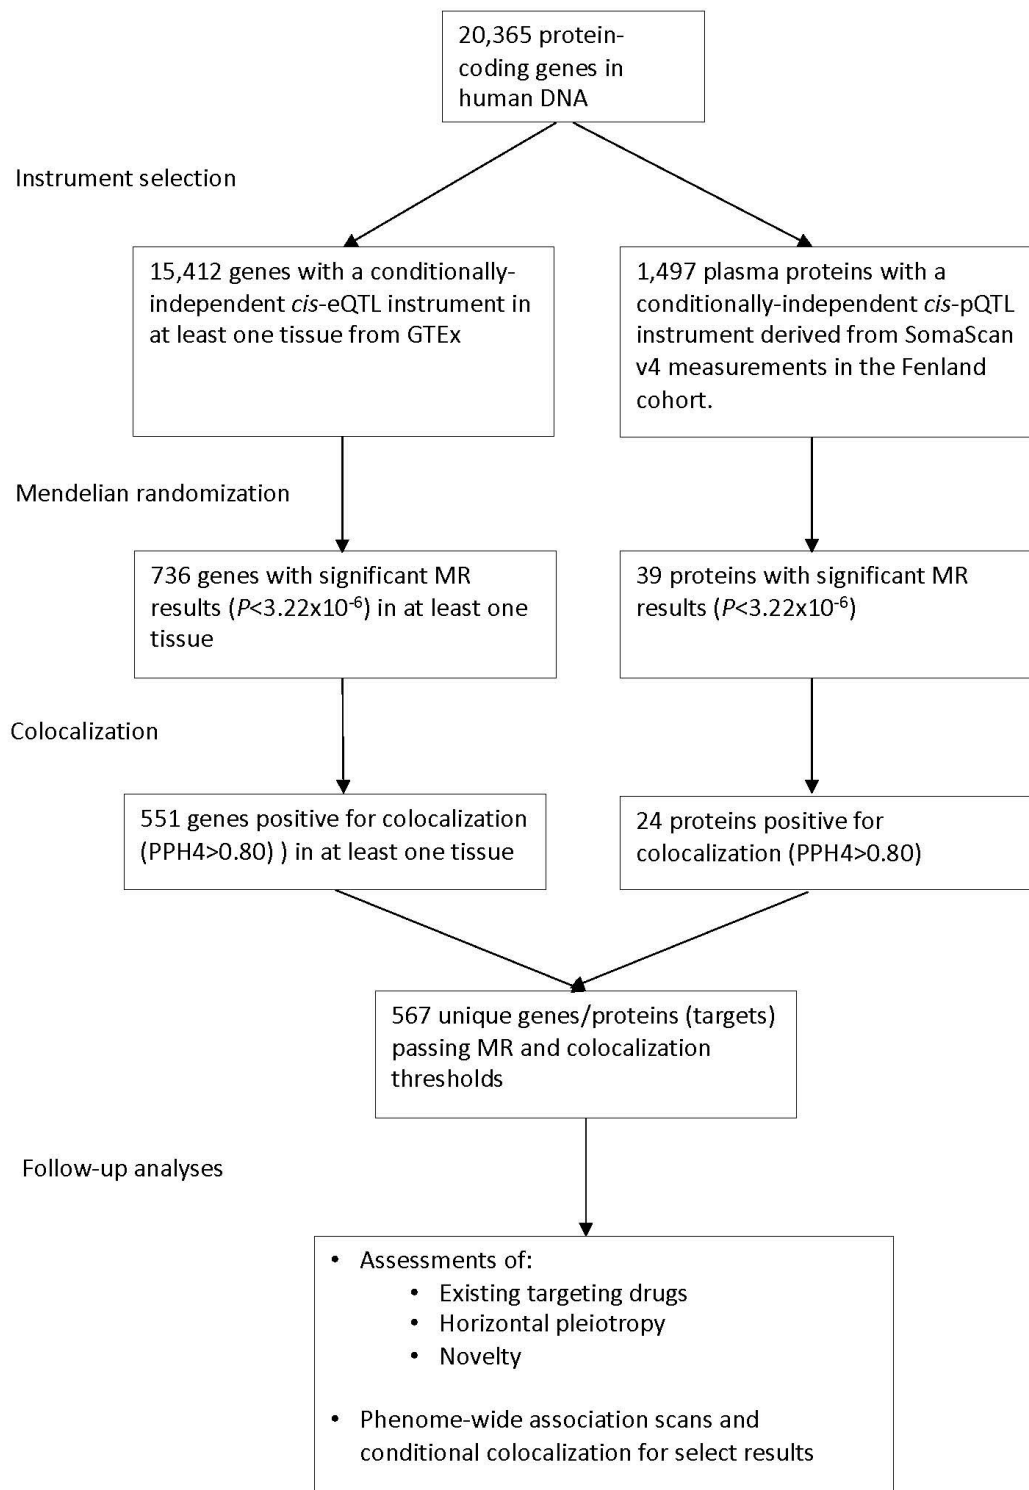

**Figure 1**

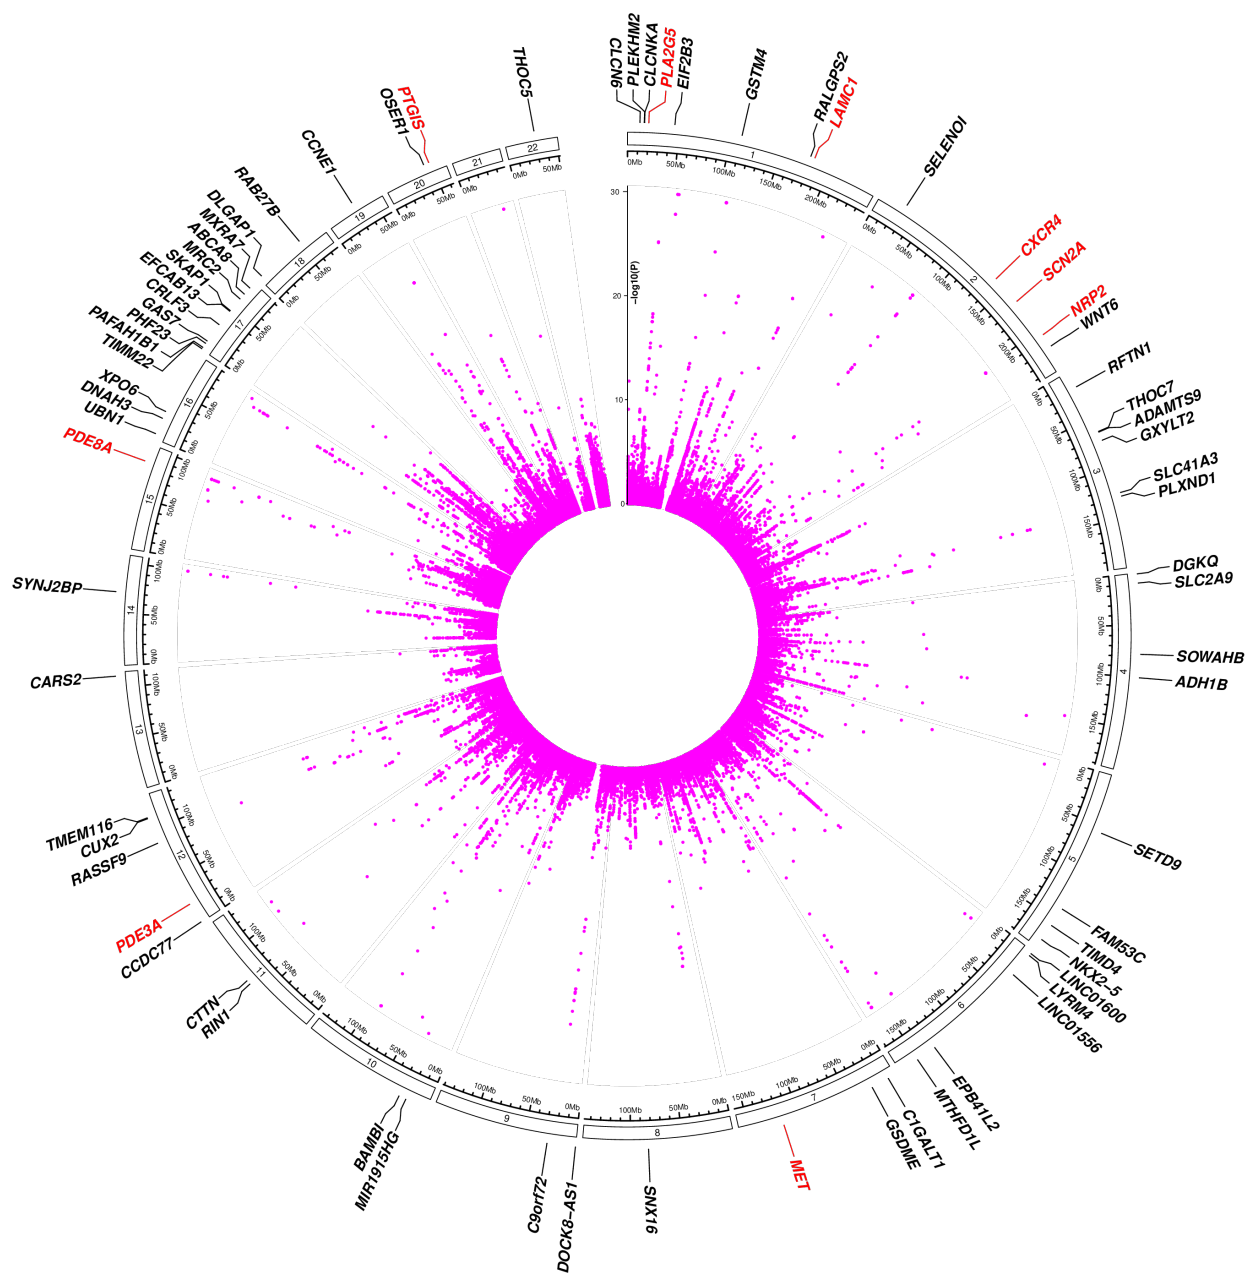

Figure 2

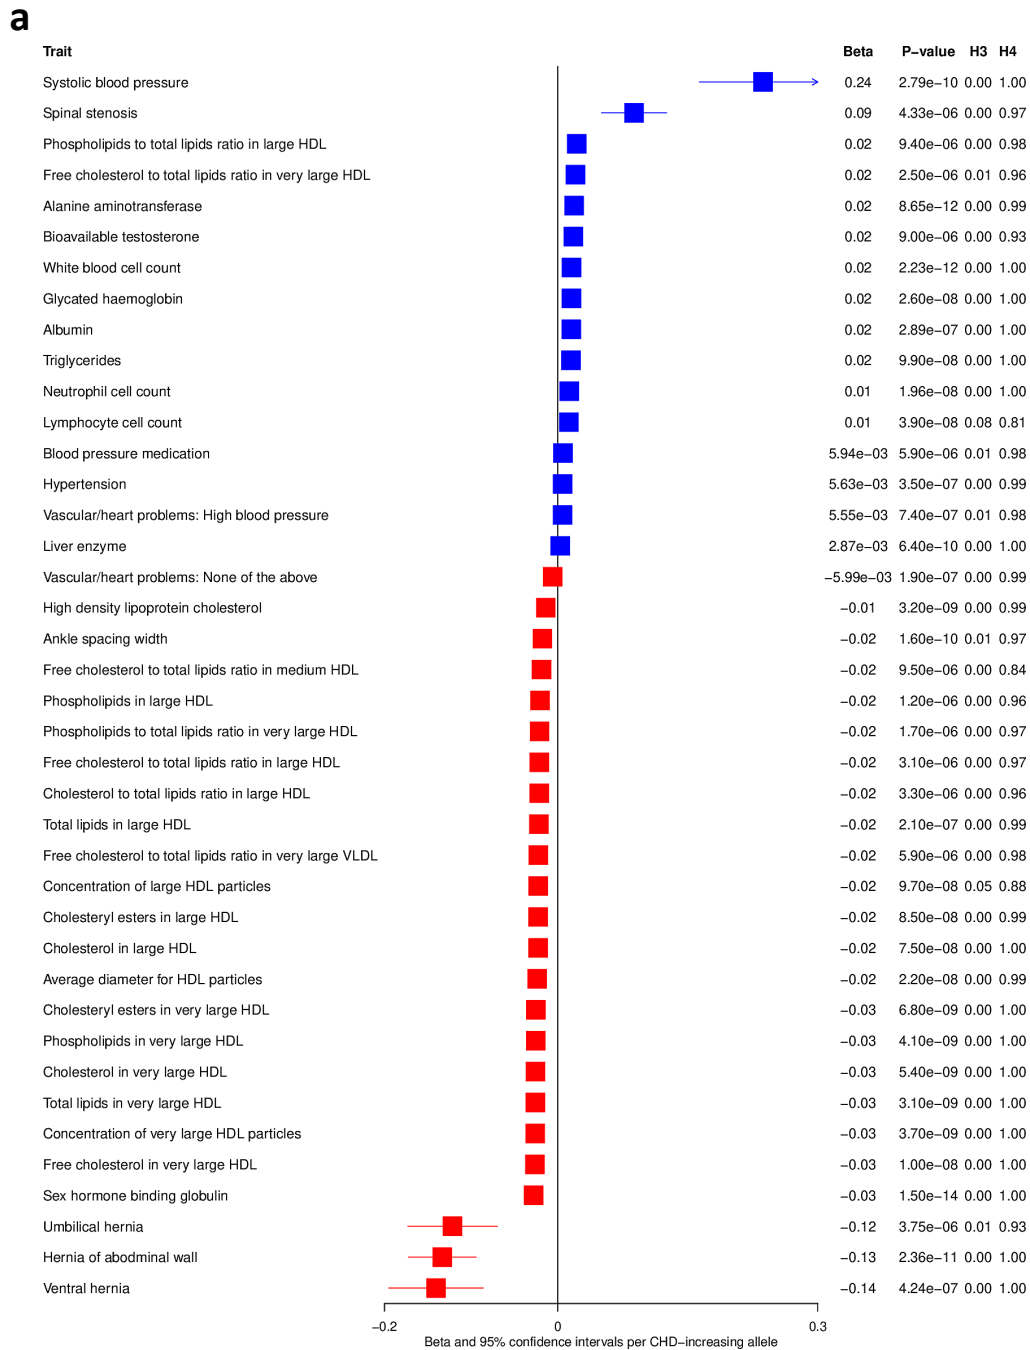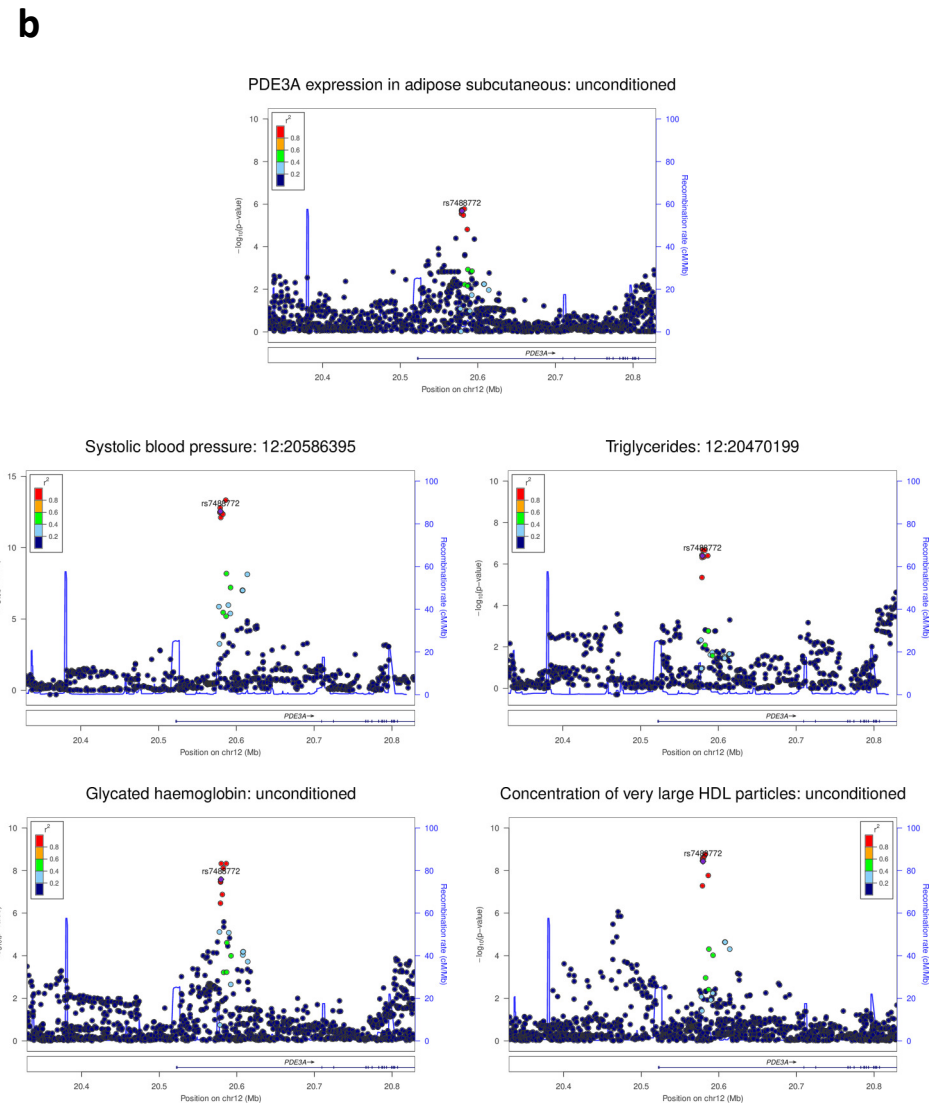

**Figure 3**

**a**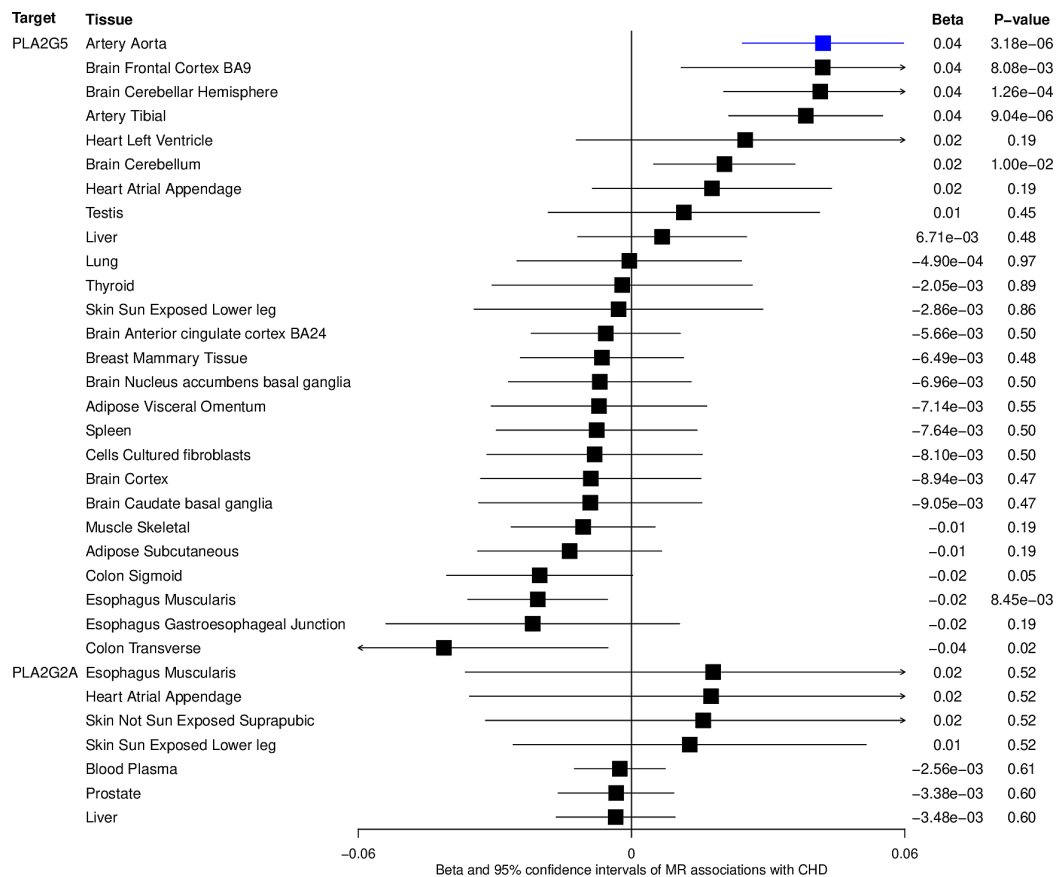**b**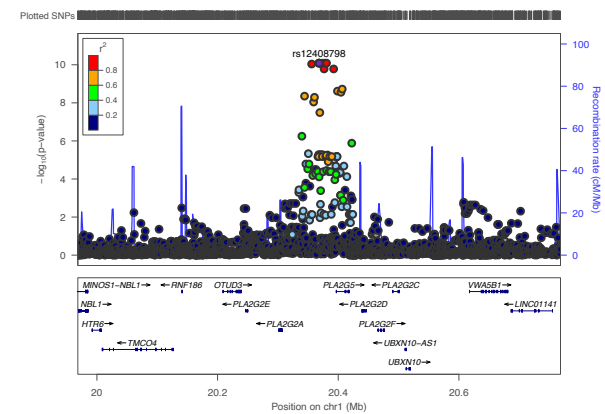**c**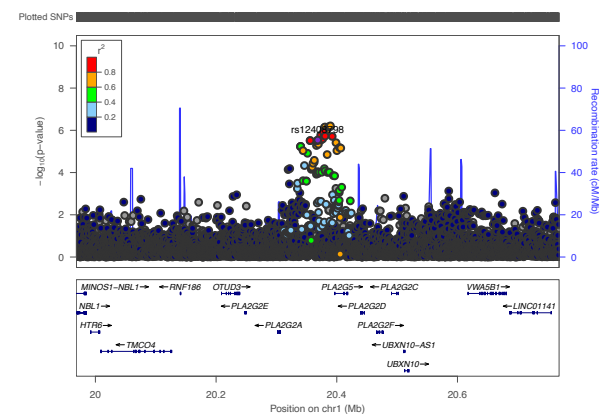**d**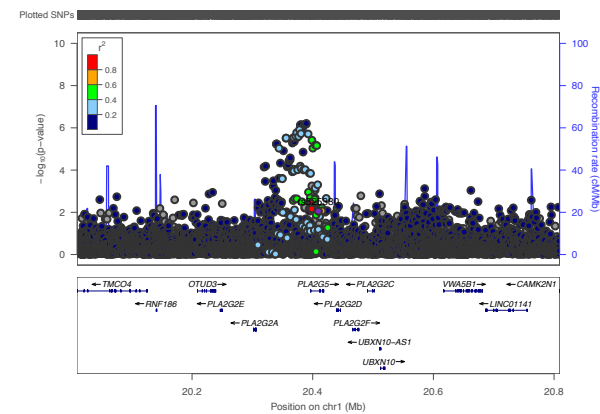**Figure 4**

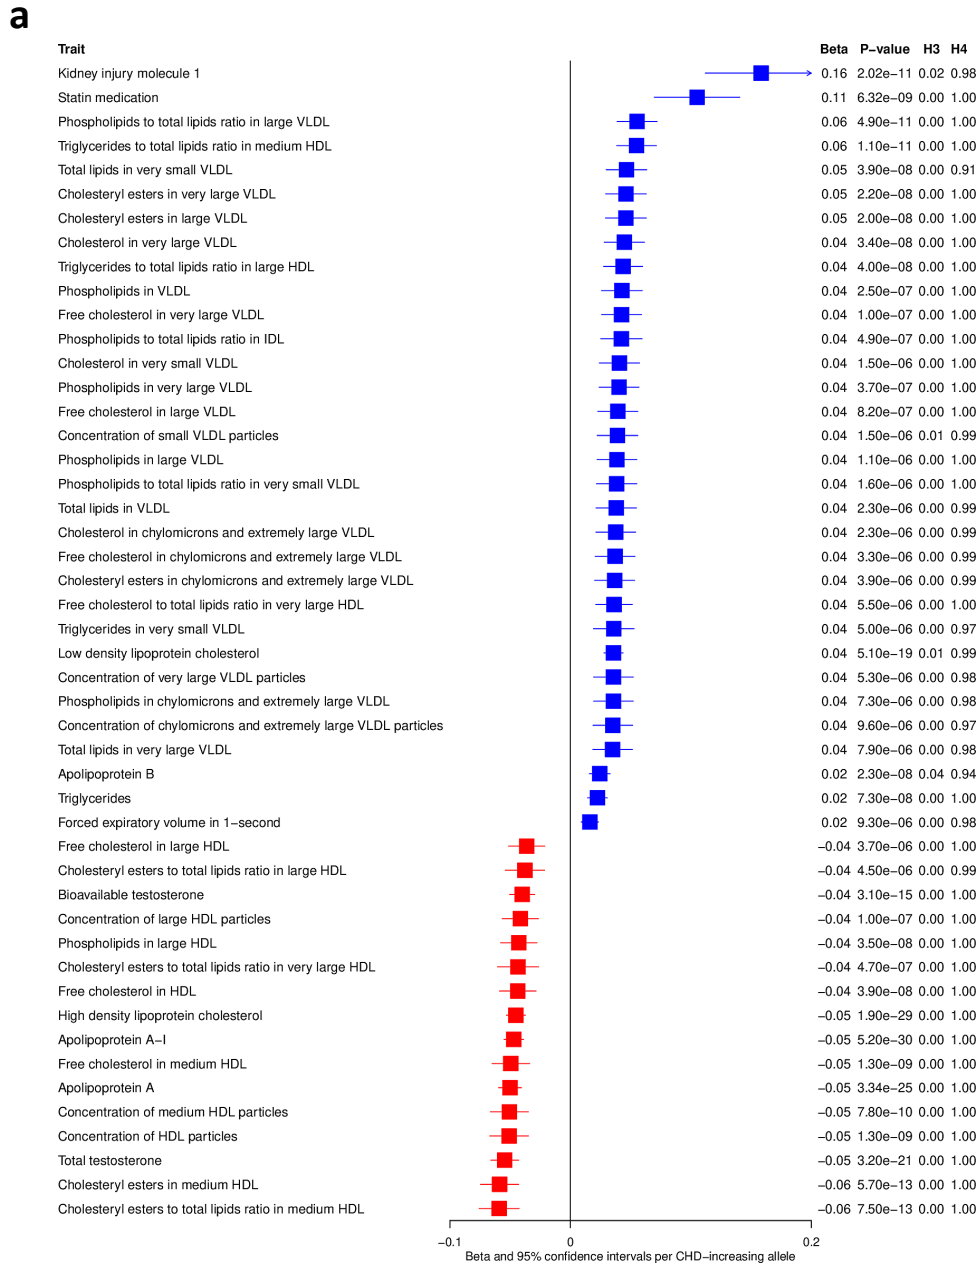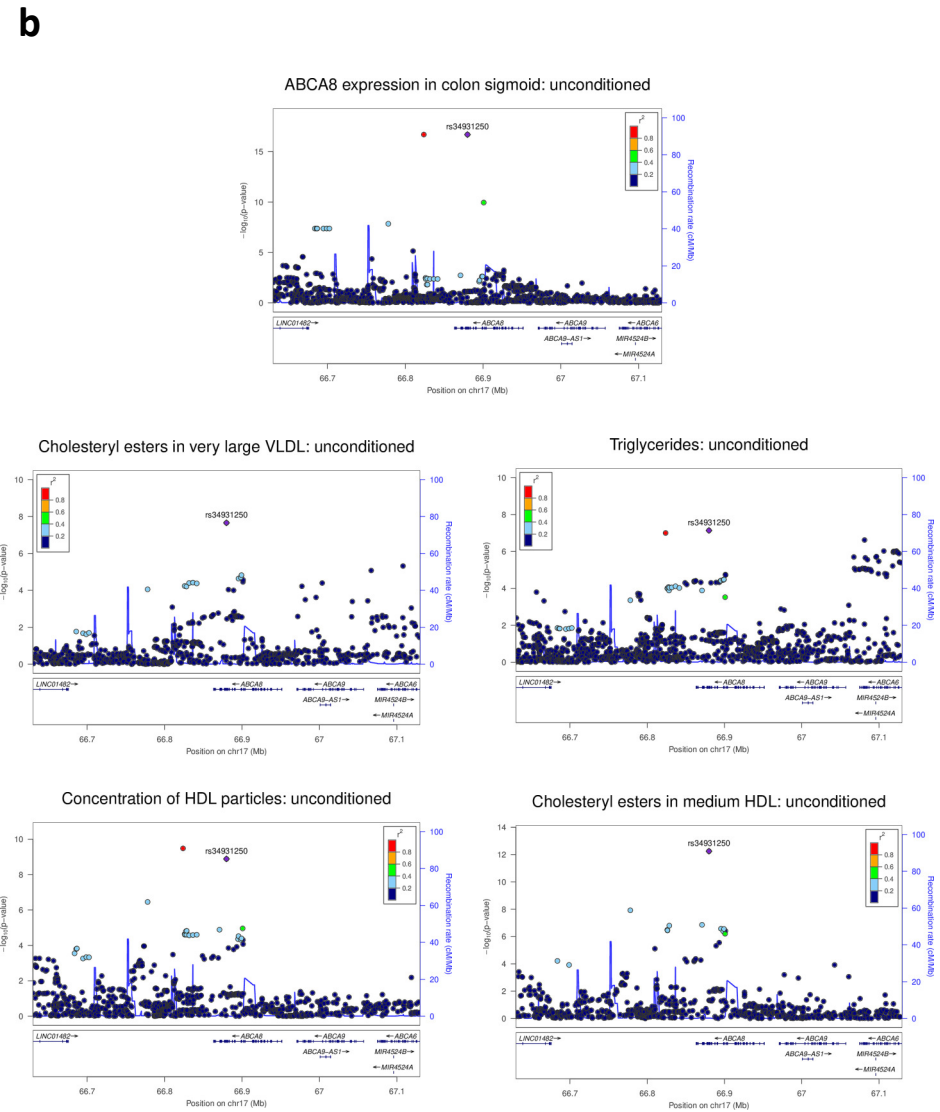

**Figure 5**
